# Supplementary material
Source: PubMed Central journal article supplement (PMC3135953)
Supplement: supp_pp.110.164756_164756x_Supplemental_figure_S4.pdf [file supp_pp.110.164756_164756x_Supplemental_figure_S4.pdf]

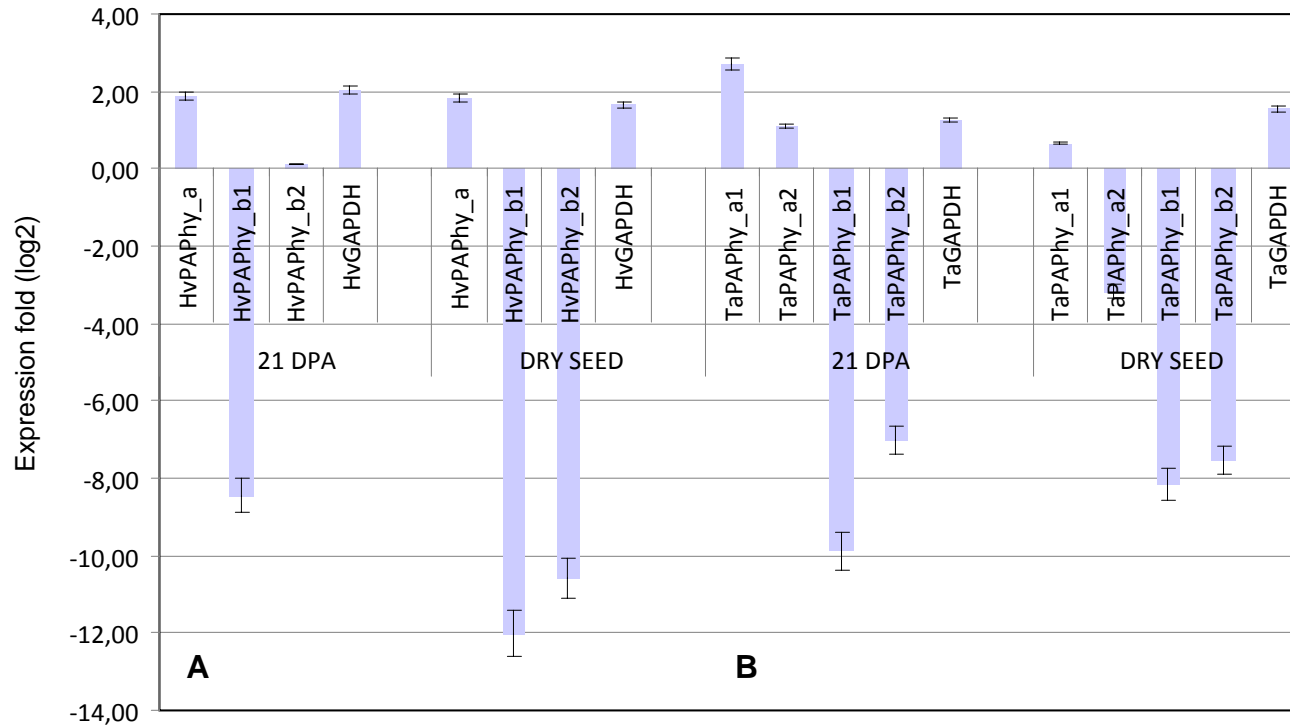

**Supplemental Figure S4.** *TaPAPhy* and *HvPAPhy* transcripts in developing (21 days post anthesis (DPA)) and dry grains of barley (A) and wheat (B). Expression levels were Log2 transformed and normalized to alpha 2 tubulin in developing and mature grains. Glyceraldehyde-3-P dehydrogenase (GAPDH) known to be present in mature grains (Tauris et. al 2009) was included as positive control.
