# Supplementary material
Source: PubMed Central journal article supplement (PMC3135953)
Supplement: supp_pp.110.164756_164756x_Supplemental_figure_S5.pdf [file supp_pp.110.164756_164756x_Supplemental_figure_S5.pdf]

**A**

|            |                                                                                   |     |     |     |     |     |     |     |
|------------|-----------------------------------------------------------------------------------|-----|-----|-----|-----|-----|-----|-----|
|            | 10                                                                                | 20  | 30  | 40  | 50  | 60  | 70  | 80  |
| TaPAPhy_a1 | mwmwrgs111111aaavaaaAEPASTLTGSPRPVTVALREDRGHAVDLPDTDPVRORRATGWAPEQIAVALSAAPTSAW   |     |     |     |     |     |     |     |
| TaPAPhy_a2 | .....p-.....E.....P.....V.....                                                    |     |     |     |     |     |     |     |
| TaPAPhy_b1 | .....p-.....E.....P.....V.....                                                    |     |     |     |     |     |     |     |
| TaPAPhy_b2 | .....mp-.....p-a.v.....E.....P.....V.....                                         |     |     |     |     |     |     |     |
|            | 90                                                                                | 100 | 110 | 120 | 130 | 140 | 150 | 160 |
| TaPAPhy_a1 | VSWITGEFQMGGTVKPLDPTGTVGVSVRYGLAADS LVRQASGDALVYSQLYPFEGLQnytSGIHHVRLQGLEPATKYYYQ |     |     |     |     |     |     |     |
| TaPAPhy_a2 | .....D.....A.....E.....T.....E.....G.....                                         |     |     |     |     |     |     |     |
| TaPAPhy_b1 | .....D.....A.....A.E.T.E.....I.L.....G.....                                       |     |     |     |     |     |     |     |
| TaPAPhy_b2 | .....D.....A.....E.T.....G.....                                                   |     |     |     |     |     |     |     |
|            | 170                                                                               | 180 | 190 | 200 | 210 | 220 | 230 | 240 |
| TaPAPhy_a1 | CGDPALPGAMSAVHAFRTMPAVGPRSYPGRIAVVGDGLTYnttSTVDHMASNRPDVLLVGDVCYANMYLTngtGADCY    |     |     |     |     |     |     |     |
| TaPAPhy_a2 | .....I.....                                                                       |     |     |     |     |     |     |     |
| TaPAPhy_b1 | .....I.....D.....E.....Q.....L.....S.....L.....T.....                             |     |     |     |     |     |     |     |
| TaPAPhy_b2 | .....S.I.....E.....Q.....L.....S.....L.....T.....                                 |     |     |     |     |     |     |     |
|            | 250                                                                               | 260 | 270 | 280 | 290 | 300 | 310 | 320 |
| TaPAPhy_a1 | SCAFGKSTPIHETYQPRWDYWGRYMEAVTSGTPMMVVEGNHEIEEQIGnktFAAYRSRFAPSTESGSFSPFYYSFDAGG   |     |     |     |     |     |     |     |
| TaPAPhy_a2 | .....S.A.....P.....S.....Q.....S.A.....M.E.....                                   |     |     |     |     |     |     |     |
| TaPAPhy_b1 | .....S.A.....P.....S.....Q.....S.A.....M.E.....                                   |     |     |     |     |     |     |     |
| TaPAPhy_b2 | .....S.A.....P.....S.....Q.....S.A.....M.E.....                                   |     |     |     |     |     |     |     |
|            | 330                                                                               | 340 | 350 | 360 | 370 | 380 | 390 | 400 |
| TaPAPhy_a1 | IHFLMLGAYADYGRSGEQYRWLEKDLAKVDRSVTPWLAVGWHAPWYTTYKAHYREVECMRVAMEELLHSHGLDIAFTGHV  |     |     |     |     |     |     |     |
| TaPAPhy_a2 | .....Y.....                                                                       |     |     |     |     |     |     |     |
| TaPAPhy_b1 | .....I.....A.....SK.....Y.....S.....A.....Y.Y.....V.....                          |     |     |     |     |     |     |     |
| TaPAPhy_b2 | .....I.....A.....SK.....S.....A.....Y.Y.....V.....                                |     |     |     |     |     |     |     |
|            | 410                                                                               | 420 | 430 | 440 | 450 | 460 | 470 | 480 |
| TaPAPhy_a1 | HAYERSNRVfnytlDPCGAVHISVGDGGNREKMATTHADEPGHCPDPRPKNAFIGGFASnftSGPAAGRFCWDROPDY    |     |     |     |     |     |     |     |
| TaPAPhy_a2 | .....D.....R.....E.MST.D.M.....F.....S.....                                       |     |     |     |     |     |     |     |
| TaPAPhy_b1 | .....D.....R.....E.MST.D.M.....F.....S.....                                       |     |     |     |     |     |     |     |
| TaPAPhy_b2 | .....D.....R.....E.MST.D.M.....F.....S.....                                       |     |     |     |     |     |     |     |
|            | 490                                                                               | 500 | 510 | 520 | 530 | 540 | 550 |     |
| TaPAPhy_a1 | SAYRESSFGHGILEVKnethALWRWHRNQDHYG-SAGDEIYIVREPHRC LHKHnssRPAHGRSnttRESGG          |     |     |     |     |     |     |     |
| TaPAPhy_a2 | .....M.....t.....0.....                                                           |     |     |     |     |     |     |     |
| TaPAPhy_b1 | .....Y.....K.....L.QGAV.....E.....L.SSIAAYF-----                                  |     |     |     |     |     |     |     |
| TaPAPhy_b2 | .....K.....L.QGAV.....E.....L.SSIAAYF-----                                        |     |     |     |     |     |     |     |
