# Supplementary material
Source: PubMed Central journal article supplement (PMC3135953)
Supplement: supp_pp.110.164756_164756x_Supplemental_Table_S1.pdf [file supp_pp.110.164756_164756x_Supplemental_Table_S1.pdf]

**Supplemental Table S1.** Molecular features of the wheat, barley, maize and rice PAPHy's. Wheat Ta\_ACP and barley HvPAP\_c were included for multiple alignment purposes. t-AA, the translated amino acids; SP, signal peptide; MW, predicted molecular weight of the deglycosylated mature protein minus signal peptide; differences in N-linked glycosylation sites between the isoforms are indicated in bold; C-terminal phosphorylation sites are only predicted for recombinant proteins as full length of which the sites are indicated in bold (<http://www.cbs.dtu.dk/services/NetPhosYeast>). The putative localization has been predicted by TargetP 1.1 (<http://www.cbs.dtu.dk/services/TargetP/>).

| Isoform    | ORF (bp) | t-AA length | SP length | MW in kDa | Predicted glycosylations N-X-(S/T)                                                     | C-terminal phosphorylation (NetPhosYeast) | TargetP 1.1 prediction |
|------------|----------|-------------|-----------|-----------|----------------------------------------------------------------------------------------|-------------------------------------------|------------------------|
| TaPAPhy_a1 | 1653     | 551         | 22        | 58        | NYT 137; NTT 202; NGT 233; NKT 289; NYT 411; NFT 462; NET 497; <b>NSS</b> 533; NTT 543 | ...CLHKHNSRPAHGRSNTTRESGG                 | Secreted/Vacuole       |
| TaPAPhy_a2 | 1647     | 550         | 21        | 58.6      | NYT 136; NTT 201; NGT 232; NKT 288; NYT 410; NFT 461; NET 496; <b>NST</b> 532; NTT 543 | ...CLHKHNSRPAHGRSNTTRESGG                 | Secreted/Vacuole       |
| TaPAPhy_b1 | 1617     | 539         | 21        | 57,4      | NYT 135; NTT 200; NGT 231; NKT 287; NYT 409; NFT 460; NET 495                          | ... CLLK <b>SS</b> IAAYF                  | Secreted/Vacuole       |
| TaPAPhy_b2 | 1614     | 538         | 20        | 57,4      | same as TaPAPhy_b1                                                                     | ... CLLK <b>SS</b> IAAYF                  | Secreted/Vacuole       |
| Ta_ACP     | 1434     | 478         | 23        | 52,8      | NYT 104; NVT 365; NRT 422                                                              | ... RYESLQSLQSLMSML                       | Mitochondrion          |
| HvPAPhy_a  | 1635     | 545         | 25        | 57,8      | NYT 140; NTT 205; NGT 236; NKT 292; NYT 414; NFT 465; NET 500; <b>NWT</b> 536          | ... CLHKHNWTRPAHGP                        | Secreted/Vacuole       |
| HvPAPhy_b1 | 1611     | 538         | 20        | 57,2      | NYT 135; NTT 200; NGT 231; NKT 287; <b>NYS</b> 329; NYT 408; NFT 459; NET 494          | ... CLLK <b>SS</b> IAAYF                  | Secreted/Vacuole       |
| HvPAPhy_b2 | 1611     | 538         | 20        | 57,2      | same as HvPAPhy_b1                                                                     | ... CLL <b>SS</b> IAAYF                   | Secreted/Vacuole       |
| HvPAP_c    | 1695     | 565         | 32        | 59        | NYT 158; NST 223; NRT 356; NYT 434; NFT 484; NST 519                                   | ... CLLQPRGVISQDS                         | Chloroplast            |
| OsPAPhy_b  | 1620     | 540         | 21        | 57,5      | NYT 135; NTT 200; NGT 231; NST 244; NKT 287; NYT 409; NFT 461; NET 496                 | ... CLIK <b>SS</b> RNRIAYY                | Secreted/Vacuole       |
| ZmPAPhy_b  | 1635     | 545         | 23        | 57,4      | NYT 140; NTT 205; NGT 236; NRT 292; NYT 414; NFT 466; NDT 501                          | ... CLAKTARLLAY                           | Secreted/Vacuole       |
