# Supplementary material
Source: PubMed Central journal article supplement (PMC3135953)
Supplement: supp_pp.110.164756_164756x_Supplemental_Table_S3.pdf [file supp_pp.110.164756_164756x_Supplemental_Table_S3.pdf]

**Supplemental Table S3.** Phylogenetic distances between selected plant PAP and PAPhy proteins (clustal W alignment). The percent of similarity is shown in the upper triangle panel., The percent of divergence is shown in the lower triangle. Genbank protein accession numbers: HvPAPhy\_a, ACR23331; TaPAPhy\_a1, ACR23326; TaPAPhy\_a2, ACR23327; HvPAPhy\_b1, ACR23332; HvPAPhy\_b2, ACR23333; TaPAPhy\_b1, ACR23328; TaPAPhy\_b2, ACR23329; OsPAPhy\_b, ADG07931; ZmPAPhy\_b, ACR23335; *Glycine max* PAPhy\_b, AAE83899; *A. thaliana* PAP15, AF448726, *Nicotiana trunculata*, AAX71115; *Nicotiana tabacum* PAPhy, ABP96799; ZmPAP\_c, ACR23336; HvPAP\_c, ACR23334; *A. thaliana* PAP\_c, AAQ93685; *phaseolus vulgaris* PAP, CCA04644; *Phaseolus vulgaris* PAP, AB116719; Ta\_ACP, ACR23330; *Ipomea batatas* PAP, AAF19821; *G. Max* PAP, AAF60316.

|    | 1    | 2    | 3    | 4    | 5    | 6    | 7    | 8    | 9    | 10   | 11   | 12   | 13   | 14   | 15   | 16   | 17   | 18   | 19   | 20   | 21   | 22   |    |            |
|----|------|------|------|------|------|------|------|------|------|------|------|------|------|------|------|------|------|------|------|------|------|------|----|------------|
| 1  |      | 91,4 | 92,7 | 86,0 | 85,7 | 86,6 | 87,5 | 81,6 | 79,6 | 64,8 | 66,0 | 69,3 | 67,5 | 58,7 | 58,7 | 52,7 | 29,1 | 33,0 | 30,3 | 28,8 | 6,3  | 5,9  | 1  | HvPAPhy_a  |
| 2  | 7,4  |      | 97,1 | 86,8 | 86,6 | 87,6 | 87,9 | 81,3 | 80,7 | 64,4 | 66,6 | 68,9 | 65,9 | 58,3 | 57,9 | 52,1 | 29,6 | 30,8 | 28,0 | 27,1 | 6,3  | 5,9  | 2  | TaPAPhy_a1 |
| 3  | 6,8  | 2,8  |      | 88,5 | 88,3 | 89,8 | 90,1 | 82,6 | 82,1 | 64,9 | 66,8 | 68,9 | 66,7 | 58,9 | 57,8 | 52,5 | 30,4 | 32,8 | 28,0 | 27,1 | 5,7  | 5,0  | 3  | TaPAPhy_a2 |
| 4  | 14,4 | 13,9 | 11,7 |      | 98,9 | 94,8 | 95,9 | 83,8 | 81,8 | 67,0 | 67,4 | 70,2 | 69,1 | 58,5 | 57,4 | 52,1 | 29,8 | 33,4 | 29,3 | 28,8 | 6,9  | 7,4  | 4  | HvPAPhy_b1 |
| 5  | 15,1 | 14,6 | 12,3 | 0,7  |      | 94,2 | 95,4 | 83,8 | 81,4 | 66,9 | 67,5 | 70,4 | 68,6 | 58,6 | 57,4 | 52,3 | 29,8 | 33,4 | 29,5 | 28,8 | 6,9  | 8,3  | 5  | HvPAPhy_b2 |
| 6  | 13,9 | 12,8 | 10,4 | 5,0  | 5,8  |      | 97,6 | 84,6 | 82,6 | 66,6 | 68,9 | 70,1 | 68,3 | 60,1 | 58,8 | 52,9 | 30,4 | 31,9 | 30,5 | 28,5 | 5,4  | 2,9  | 6  | TaPAPhy_b1 |
| 7  | 12,8 | 12,3 | 10,0 | 3,8  | 4,6  | 2,3  |      | 84,9 | 83,1 | 67,5 | 68,3 | 71,2 | 68,8 | 60,6 | 58,9 | 52,7 | 28,3 | 31,9 | 28,9 | 28,8 | 6,6  | 4,4  | 7  | TaPAPhy_b2 |
| 8  | 20,0 | 21,2 | 19,3 | 16,3 | 16,8 | 16,5 | 15,1 |      | 80,7 | 66,4 | 66,8 | 69,0 | 67,9 | 58,6 | 57,7 | 51,9 | 30,0 | 30,1 | 29,3 | 30,2 | 6,0  | 7,1  | 8  | OsPAPhy_b  |
| 9  | 21,4 | 20,3 | 18,6 | 19,7 | 20,1 | 18,9 | 18,4 | 20,0 |      | 65,2 | 64,7 | 67,0 | 66,9 | 59,5 | 58,6 | 52,3 | 28,9 | 31,2 | 30,5 | 29,2 | 7,2  | 8,6  | 9  | ZmPAPhy_b  |
| 10 | 45,8 | 45,5 | 44,9 | 42,2 | 42,1 | 42,6 | 41,1 | 42,6 | 44,2 |      | 74,1 | 71,9 | 71,1 | 56,7 | 56,5 | 53,6 | 30,2 | 36,2 | 32,0 | 30,4 | 10,2 | 6,5  | 10 | AAE83899   |
| 11 | 42,8 | 43,5 | 42,6 | 39,5 | 39,7 | 38,3 | 38,4 | 42,9 | 45,9 | 29,6 |      | 71,5 | 71,1 | 59,3 | 59,1 | 58,0 | 29,6 | 33,8 | 30,5 | 31,1 | 9,9  | 8,0  | 11 | AF448726   |
| 12 | 38,5 | 38,0 | 38,1 | 35,7 | 35,7 | 36,8 | 35,4 | 38,8 | 40,0 | 35,2 | 35,1 |      | 73,5 | 57,2 | 58,3 | 54,5 | 29,1 | 32,8 | 32,8 | 30,9 | 4,8  | 6,8  | 12 | AAX71115   |
| 13 | 40,7 | 42,9 | 41,7 | 38,2 | 39,0 | 39,2 | 38,1 | 40,4 | 41,3 | 35,5 | 36,6 | 31,7 |      | 56,5 | 55,4 | 55,3 | 31,5 | 34,5 | 34,1 | 30,2 | 9,9  | 10,0 | 13 | ABP96799   |
| 14 | 58,9 | 57,5 | 57,6 | 56,9 | 56,8 | 56,6 | 54,9 | 58,3 | 57,3 | 62,8 | 58,6 | 61,5 | 61,5 |      | 80,9 | 64,3 | 30,4 | 31,7 | 34,1 | 29,0 | 9,3  | 9,4  | 14 | ZmPAP_c    |
| 15 | 57,9 | 57,6 | 59,0 | 58,7 | 58,5 | 58,7 | 56,9 | 57,7 | 58,2 | 62,5 | 58,0 | 60,1 | 64,1 | 20,8 |      | 65,4 | 33,0 | 32,3 | 31,0 | 30,4 | 10,8 | 10,9 | 15 | HvPAP_c    |
| 16 | 65,4 | 67,5 | 66,2 | 66,1 | 65,9 | 64,6 | 64,4 | 66,2 | 66,8 | 61,7 | 54,5 | 66,7 | 62,2 | 43,3 | 42,2 |      | 30,1 | 30,1 | 31,6 | 26,6 | 5,1  | 7,4  | 16 | AAQ93685   |
| 17 | 70,9 | 70,4 | 69,6 | 70,2 | 70,2 | 69,6 | 71,7 | 70,0 | 71,1 | 69,8 | 70,4 | 70,9 | 68,5 | 69,6 | 67,0 | 69,9 |      | 55,9 | 56,1 | 64,3 | 9,3  | 13,9 | 17 | CAA04644   |
| 18 | 67,0 | 69,2 | 67,2 | 66,6 | 66,6 | 68,1 | 68,1 | 69,9 | 68,8 | 63,8 | 66,2 | 67,2 | 65,5 | 68,3 | 67,7 | 69,9 | 44,1 |      | 72,7 | 58,3 | 12,0 | 13,3 | 18 | AB116719   |
| 19 | 69,7 | 72,0 | 72,0 | 70,7 | 70,5 | 69,5 | 71,1 | 70,7 | 69,5 | 68,0 | 69,5 | 67,2 | 65,9 | 65,9 | 69,0 | 68,4 | 43,9 | 27,3 |      | 54,3 | 11,7 | 15,3 | 19 | Ta_ACP     |
| 20 | 71,2 | 72,9 | 72,9 | 71,2 | 71,2 | 71,5 | 71,2 | 69,8 | 70,8 | 69,6 | 68,9 | 69,1 | 69,8 | 71,0 | 69,6 | 73,4 | 35,7 | 41,7 | 45,7 |      | 9,3  | 9,1  | 20 | AAF19821   |
| 21 | 93,7 | 93,7 | 94,3 | 93,1 | 93,1 | 94,6 | 93,4 | 94,0 | 92,8 | 89,8 | 90,1 | 95,2 | 90,1 | 90,7 | 89,2 | 94,9 | 90,7 | 88,0 | 88,3 | 90,7 |      | 55,0 | 21 | AAF60316   |
| 22 | 94,1 | 94,1 | 95,0 | 92,6 | 91,7 | 97,1 | 95,6 | 92,9 | 91,4 | 93,5 | 92,0 | 93,2 | 90,0 | 90,6 | 89,1 | 92,6 | 86,1 | 86,7 | 84,7 | 90,9 | 45,0 |      | 22 | CAC09923   |
|    | 1    | 2    | 3    | 4    | 5    | 6    | 7    | 8    | 9    | 10   | 11   | 12   | 13   | 14   | 15   | 16   | 17   | 18   | 19   | 20   | 21   | 22   |    |            |
