# Supplementary material
Source: PubMed Central journal article supplement (PMC3135953)
Supplement: supp_pp.110.164756_164756x_Supplemental_Table_S4.pdf [file supp_pp.110.164756_164756x_Supplemental_Table_S4.pdf]

**Supplemental Table S4.** Oligonucleotides for cloning of *PAPhy* cDNAs from wheat, barley, maize and rice, wheat acid phosphatase (*Ta\_ACP*), barley purple acid phosphatase “c” (*HvPAP\_c*), barley and wheat  $\alpha$ 2-tubulin and maize *ZmPAP\_c*.

| Isogenes             | Forward primer                                            | Reverse primer                                                 | PCR product (bp) |
|----------------------|-----------------------------------------------------------|----------------------------------------------------------------|------------------|
| <b>Wheat</b>         |                                                           |                                                                |                  |
| <i>TaPAPhy_a1</i>    | <i>Ta_PAPhy_a1_fw</i><br>5'-TGGAACGCCCGCACCAAAGGACATG-3'  | <i>Ta_PAPhy_a1_rv</i><br>5'-CGTGTACACCCACACGTGGGACA-3'         | 1790             |
| <i>TaPAPhy_a2</i>    | <i>Ta_PAPhy_a2_fw</i><br>5'-ATGTGGATGTGGAGGGGGTC-3'       | <i>Ta_PAPhy_a2_rv</i><br>5'-CGACGGACAGTTGCTACTGTA-3'           | 1740             |
| <i>TaPAPhy_b1</i>    | <i>Ta_PAPhy_b1_fw</i><br>5'-ATGTGGATGTGGAGGGGGT-3'        | <i>Ta_PAPhy_b1_rv</i><br>5'-CACAGTGTATAGACTGATACTAGATCACAAG-3' | 1822             |
| <i>TaPAPhy_b2</i>    | <i>Ta_PAPhy_b2_fw</i><br>5'-CGCCCGCACCAAAGGACATGTGGAT-3'  | <i>Ta_PAPhy_b2_rv</i><br>5'-CATATGAAAAAGATACGTACCA-3'          | 1851             |
| <i>Ta_ACP</i>        | <i>Ta_ACP_fw</i><br>5'-AGATGAGGGGGCTGGGCT-3'              | <i>Ta_ACP_rv</i><br>5'-ATCTGGCTGACTGGAATTTTACA-3'              | 1434             |
| <i>Ta_α2-tubulin</i> | <i>Ta_α2-tub_fw</i><br>5'-CCGCCCCATGAGGGAGTGC-3'          | <i>Ta_α2-tub_rv</i><br>5'-CCGAGGTAAACAATAAAATTAGTA-3'          | 1622             |
| <b>Barley</b>        |                                                           |                                                                |                  |
| <i>HvPAPhy_a</i>     | <i>Hv_PAPhy_a_fw</i><br>5'-AGCATCCCAATCCTCTCAATGCCAAGC-3' | <i>Hv_PAPhy_a_rv</i><br>5'-TTTTTATTTCCACGCATGGG-3'             | 1773             |
| <i>HvPAPhy_b1</i>    | <i>Hv_PAPhy_b1_fw</i><br>5'-ATGTGGATGTGGAGGGG-3'          | <i>Hv_PAPhy_b1_rv</i><br>5'-GCCGTACAAGCCTTTCATGCTACCT-3'       | 1784             |
| <i>HvPAPhy_b2</i>    | <i>Hv_PAPhy_b2_fw</i><br>CATATGTGATTTGGAGGG-3'            | <i>Hv_PAPhy_b2_rv</i><br>5'-GCCGTACAAGCCTTTCATGCTACCT-3'       | 1789             |
| <i>HvPAP_c</i>       | <i>Hv_PAP_c_fw</i><br>5'-GCGCCATGACCACCAGCACCATCGC-3'     | <i>Hv_PAP_c_rv</i><br>5'-CTACTTCATGGAGAAGAAGGGCGTTAC-3'        | 1865             |
| <i>Hv_α2-tubulin</i> | <i>Hv_α2-tub_fw</i><br>5'-GAGTCGTACAAACTCTCTCCGC-3'       | <i>Hv_α2-tub_rv</i><br>5'-AGGAGGCTAAGGCATAGATAACCAG-3'         | 1697             |
| <b>Maize</b>         |                                                           |                                                                |                  |
| <i>ZmPAPhy_b</i>     | <i>Zm_PAPhy_fw</i><br>5'-AGTGGGAGGGAACACCGCAGC-3'         | <i>Zm_PAPhy_rv</i><br>5'-TAGGAGTGATGGATCAATCAATAGGC-3'         | 1677             |
| <i>ZmPAP_c</i>       | <i>Zm_PAP_c_fw</i><br>5'-TGGCTACGGCCATGGCGA-3'            | <i>Zm_PAP_c_rv</i><br>5'-TTAATACATAATAGCAGAAATTTTGTCACTAA-3'   | 1876             |
| <b>Rice</b>          |                                                           |                                                                |                  |
| <i>OsPAPhy_b</i>     | <i>Os_PAPhy_b_fw</i><br>5'-ATGCGGATGAGGGTCTCACTG-3'       | <i>Os_PAPhy_b_rv</i><br>5'-GCAAGGCTTTCTCCATCTTGTA-3'           | 1845             |
