# Supplementary material
Source: PubMed Central journal article supplement (PMC3135953)
Supplement: supp_pp.110.164756_164756X_Supplemental_Table_S5.pdf [file supp_pp.110.164756_164756X_Supplemental_Table_S5.pdf]

**Supplemental Table S5.** Purification level and yield parameters of r-TaPAPhy a1 and b1 after five days of methanol induction.

| r-TaPAPhy_a1                                | Volume<br>(ml) | Total<br>Protein<br>(mg) | Protein<br>(mg mL <sup>-1</sup> ) | Specific<br>Phytase<br>activity<br>(U mg <sup>-1</sup> ) | Total<br>Phytase<br>activity<br>(U) | Yield<br>% | Purification<br>fold |
|---------------------------------------------|----------------|--------------------------|-----------------------------------|----------------------------------------------------------|-------------------------------------|------------|----------------------|
| <b>Pichia supernatant<br/>broth</b>         | 2000           | 840                      | 0.42                              | 0.4                                                      | 356                                 | 100.0      | 1                    |
| <b>Dialysis</b>                             | 2200           | 770                      | 0.4                               | 0.4                                                      | 312                                 | 87.6       | 1.1                  |
| <b>Q-Sepharose</b>                          | 128            | 80.6                     | 0.6                               | 2.0                                                      | 158                                 | 44.4       | 10.4                 |
| <b>Ni<sup>2+</sup>/NTA<br/>Sepharose FF</b> | 24             | 2.6                      | 0.1                               | 18.5                                                     | 48.7                                | 13.6       | 318                  |
| <b>Vivaspin</b>                             | 1              | 2.5                      | 2.5                               | 18.5                                                     | 46.9                                | 13.2       | 330                  |

| r-TaPAPhy_b1                                | Volume<br>(ml) | Total<br>Protein<br>(mg) | Protein<br>(mg mL <sup>-1</sup> ) | Specific<br>Phytase<br>activity<br>(U mg <sup>-1</sup> ) | Total<br>Phytase<br>activity<br>(U) | Yield<br>% | Purification<br>fold |
|---------------------------------------------|----------------|--------------------------|-----------------------------------|----------------------------------------------------------|-------------------------------------|------------|----------------------|
| <b>Pichia supernatant<br/>broth</b>         | 2000           | 983                      | 0.5                               | 0.4                                                      | 1257                                | 100        | 1                    |
| <b>Dialysis</b>                             | 2200           | 971                      | 0.4                               | 0.4                                                      | 1132                                | 90         | 1.1                  |
| <b>Q-Sepharose</b>                          | 115            | 189                      | 1.6                               | 2.0                                                      | 987                                 | 78.5       | 5.2                  |
| <b>Ni<sup>2+</sup>/NTA<br/>Sepharose FF</b> | 36             | 21.1                     | 0.6                               | 36.2                                                     | 764.3                               | 60.8       | 46.6                 |
| <b>Vivaspin</b>                             | 1              | 21                       | 21                                | 36.2                                                     | 761                                 | 60.5       | 46.8                 |
