# Supplementary material
Source: PubMed Central journal article supplement (PMC3135953)
Supplement: supp_pp.110.164756_164756x_Supplemmental_Table_S6.pdf [file supp_pp.110.164756_164756x_Supplemmental_Table_S6.pdf]

**Supplemental Table S6** Oligonucleotides for qRT-PCR.

| Isogene                  | Primer_fw                        | Primer_rev                     |
|--------------------------|----------------------------------|--------------------------------|
| <b>Wheat</b>             |                                  |                                |
| <i>TaPAPhy_a1</i>        | 5'-ACAAGCACAACCTCGAGCAGG-3'      | 5'-CGATTCCCCTGTGGTGTGTTGA-3'   |
| <i>TaPAPhy_a2</i>        | 5'-CGGGAATCGGGAGGTTAACT-3'       | 5'-CGCCCGATCTACTCCAGCA-3'      |
| <i>TaPAPhy_b1</i>        | 5'-CAGCTTCAGCCACGGCATTCTTG-3'    | 5'-TCATTTCGTGTGCCATTTCCAG-3'   |
| <i>TaPAPhy_b2</i>        | 5'-TACTGGAGGTGAAGAATGAGACGC-3'   | 5'-CTGCTTCCTGTCCCATTTCCAC-3'   |
| <i>Ta_alpha2-tubulin</i> | 5'-CCAACCTGGTGCCCT-3'            | 5'-GGGCATAGGAGGAAA-3'          |
| <i>Ta_GAPDH</i>          | 5'-GCTCAAGGGTATCATGGGTTACG-3'    | 5'-GCAATTCAGCCTTAGCATCAAAG-3'  |
| <b>Barley</b>            |                                  |                                |
| <i>HvPAPhy_a</i>         | 5'-AGCTTGAGATTAACCTGTTCTACCAC-3' | 5'-GTCTATAGTTGCCATTATTGCAC-3'  |
| <i>HvPAPhy_b1</i>        | 5'-CATCCATTTTCATCATGCTCGCT-3'    | 5'-CATCTGTACTGGTCTCCTGATTTA-3' |
| <i>HvPAPhy_b2</i>        | 5'-TCTGTATCAAGGTGCTGTTGGG-3'     | 5'-AAATATGCTGCTATGCTCGAGC-3'   |
| <i>HvPAP_c</i>           | GCAGTTTCGCCACGGTATTT-3'          | 5'-CGGTGCCATGTCCACAAAGCATAT-3' |
| <i>Hv_GAPDH</i>          | 5'-GCTCAAGGGTATCATGGGTTACG-3'    | 5'-GCAATTCAGCCTTAGCATCAAAG-3'  |
