# Supplementary material
Source: PubMed Central journal article supplement (PMC3135953)
Supplement: supp_pp.110.164756_164756xsupplemental_table_S2.pdf [file supp_pp.110.164756_164756xsupplemental_table_S2.pdf]

**Supplemental Table S2.** Cloning primers, vectors, strains and results of heterologous expressions of PAPHy in *E. coli* and *P. pastoris*. Bold in the primer sequences indicates restriction sites included for cloning purposes. Bold in the amino acid sequences indicates that the amino acids are included in the expression cassette.

| Construct name                                  | Primer_fw 5'→                                                                                                       | Primer_rv 5'→                                                                                                                      | Vector/strain                             | Note                                         | Protein Expression                                              |
|-------------------------------------------------|---------------------------------------------------------------------------------------------------------------------|------------------------------------------------------------------------------------------------------------------------------------|-------------------------------------------|----------------------------------------------|-----------------------------------------------------------------|
| TaPAPHy_b1<br>( <i>E.coli</i> )                 | TaPAPHy_b1_NdeI<br>GCG <b>CATATG</b> GAGCCGGCGTCGACGCTGGAG<br>( M E P A S T L G . . . )                             | TaPAPHy_b1_Hind_III<br>CAGA <b>AAGCTT</b> TATCAAAGTATGCCGCT<br>(... <b>S S I A A Y F</b> - stop)                                   | pET15m<br>Rosetta B<br>pRARE 2<br>(Lys S) | Δ signal peptide<br>N-HIS6,<br>thrombin site | insoluble proteins used for production of polyclonal antibodies |
| TaPAPHy_a1<br>( <i>Pichia</i> )<br>Full length  | TaPAPHy_a1_Nde_I<br>GCAC <b>ATATG</b> CTGGAGCCGGCGTCGACGCTC<br>( . . . H M L E P A S T L . . . )                    | TaPAPHy_a1_Xba_I<br>TG <b>TTCTAG</b> ATTAACCTCCCGATTCCCGTGTGG<br>( . . . S N T T R E S G G - stop)                                 | pPICZ-alpha-A(NdeI)<br>pichia KM-71       | Δ signal peptide                             | present in low amount in pichia cell surface                    |
| Δ C-terminal                                    | TaPAPHy_a1_NdeI<br>as above                                                                                         | TaPAPHy_a1_Delta_C-t_XbaI<br>TG <b>TTCTAG</b> ATTAATGATGATGATGATGCTTGAGCAAGCACCT<br>( . . . <b>C L L K H H H H H H</b> -stop )     | pPICZ-alpha-A(NdeI)<br>pichia KM-71       | Δ signal peptide<br>ΔC-term,<br>C-HIS6       | <u>secreted</u><br>(2.5 mg/L)                                   |
| TaPAPHy_b1<br>( <i>Pichia</i> )<br>full length  | TaPAPHy_b1_EcoRI_Nde_I<br>GTAGA <b>ATTCGGACATATG</b> GAGCCGGCTTCGACGCTGGAG<br>( ... E F G H M E P A S T L G . . . ) | TaPAPHy_b1_Sal_I<br>ATG <b>GTCGAC</b> TCAAAGTATGCCGCT<br>(... <b>C L L K S S I A A Y F</b> - stop)                                 | pPICZ-alpha-A<br>pichia KM-71             | Δ signal peptide                             | not secreted                                                    |
| Δ C-terminal                                    | TaPAPHy_b1_Nde_I<br>GG <b>ACATATG</b> GAGCCGGCTTCGACGCTGGAG<br>( . . . H M E P A S T L G . . . )                    | TaPAPHy_b1_Delta_C-t_Xba_I<br>TG <b>TTCTAG</b> ATTAATGATGATGATGATGATGTTTGAGCAGGCATCT ( . . .<br><b>C L L K H H H H H H</b> -stop ) | pPICZ-alpha-A(NdeI)<br>pichia KM-71       | Δ signal peptide<br>ΔC-term, C-HIS6          | <u>secreted</u><br>(12-20mg/L)                                  |
| HvPAPHy_a<br>( <i>Pichia</i> )<br>Δ C-terminal  | HvPAPHy_a_Nde_I<br>CGAT <b>CATATG</b> GAAACCGCTTCGACGCTCGCT<br>( . . . H M E P L S T L A . . . )                    | HvPAPHy_a_Delta_C-t_Sal_I<br>ATG <b>GTCGAC</b> CTTGCAAGCACCTCTC<br>( . . . E R C L H K V D H H H H H H -stop)                      | pPICZ-alpha-A(NdeI)<br>pichia KM-71       | Δ signal peptide<br>ΔC-term, C-HIS6          | <u>secreted</u><br>(1.5 mg/L)                                   |
| HvPAPHy_b2<br>( <i>Pichia</i> )<br>Δ C-terminal | HvPAPHy_b2_Nde_I<br>GCAT <b>GCATATG</b> GAGCCGGCGTCG<br>( . . . H M E P A S M L . . . )                             | HvPAPHy_b2_Delta_C-t_Xba_I<br>TG <b>TTCTAG</b> ATTAATGATGATGATGATGATGTTTGAGCAGGCATCT ( . . .<br><b>C L L K H H H H H H</b> -stop ) | pPICZ-alpha-A<br>pichia KM-71             | Δ signal peptide<br>ΔC-term, C-HIS6          | <u>secreted</u><br>(2.5 mg/L)                                   |
| ZmPAPHy_b<br>( <i>Pichia</i> )<br>Δ C-terminal  | ZmPAPHy_b_EcoRI_Nde_I<br>GCTGA <b>ATTCGGACATATG</b> GAGCCGGCGTCGACGCT<br>( . . . F G H M E P A S T . . . )          | ZmPAPHy_b_Delta_C-t_Xba_I<br>TG <b>TTCTAG</b> ATTAATGATGATGATGATGCTTAAGGAGGCACTTGTCG<br>( . . . <b>C L L K H H H H H H</b> -stop ) | pPICZ-alpha-A<br>pichia KM-71             | Δ signal peptide<br>ΔC-term, C-HIS6          | <u>secreted</u><br>(3.5 mg/L)                                   |
| OsPAPHy_b<br>( <i>Pichia</i> )<br>Δ C-terminal  | OsPAPHy_b_EcoRI_Nde_I<br>CTGA <b>ATTCGGACATATG</b> GCTTCGTCGACGTT<br>( . . . E F G H M A P S S T . . . )            | OsPAPHy_b_Delta_C-t_Xba_I<br>TG <b>TTCTAG</b> ATTAATGATGATGATGATGTTTGATCAGGCACTTGTC<br>( . . . <b>C L I K H H H H H H</b> -stop )  | pPICZ-alpha-A<br>pichia KM-71             | Δ signal peptide<br>ΔC-term, C-HIS6          | <u>secreted</u><br>(3.5 mg/L)                                   |
